# Supplementary material
Source: PubMed Central journal article supplement (PMC2807338)

# Supplementary Data, S1

#4005-4005 RT:97.02-97.02 NL: 6.60E5

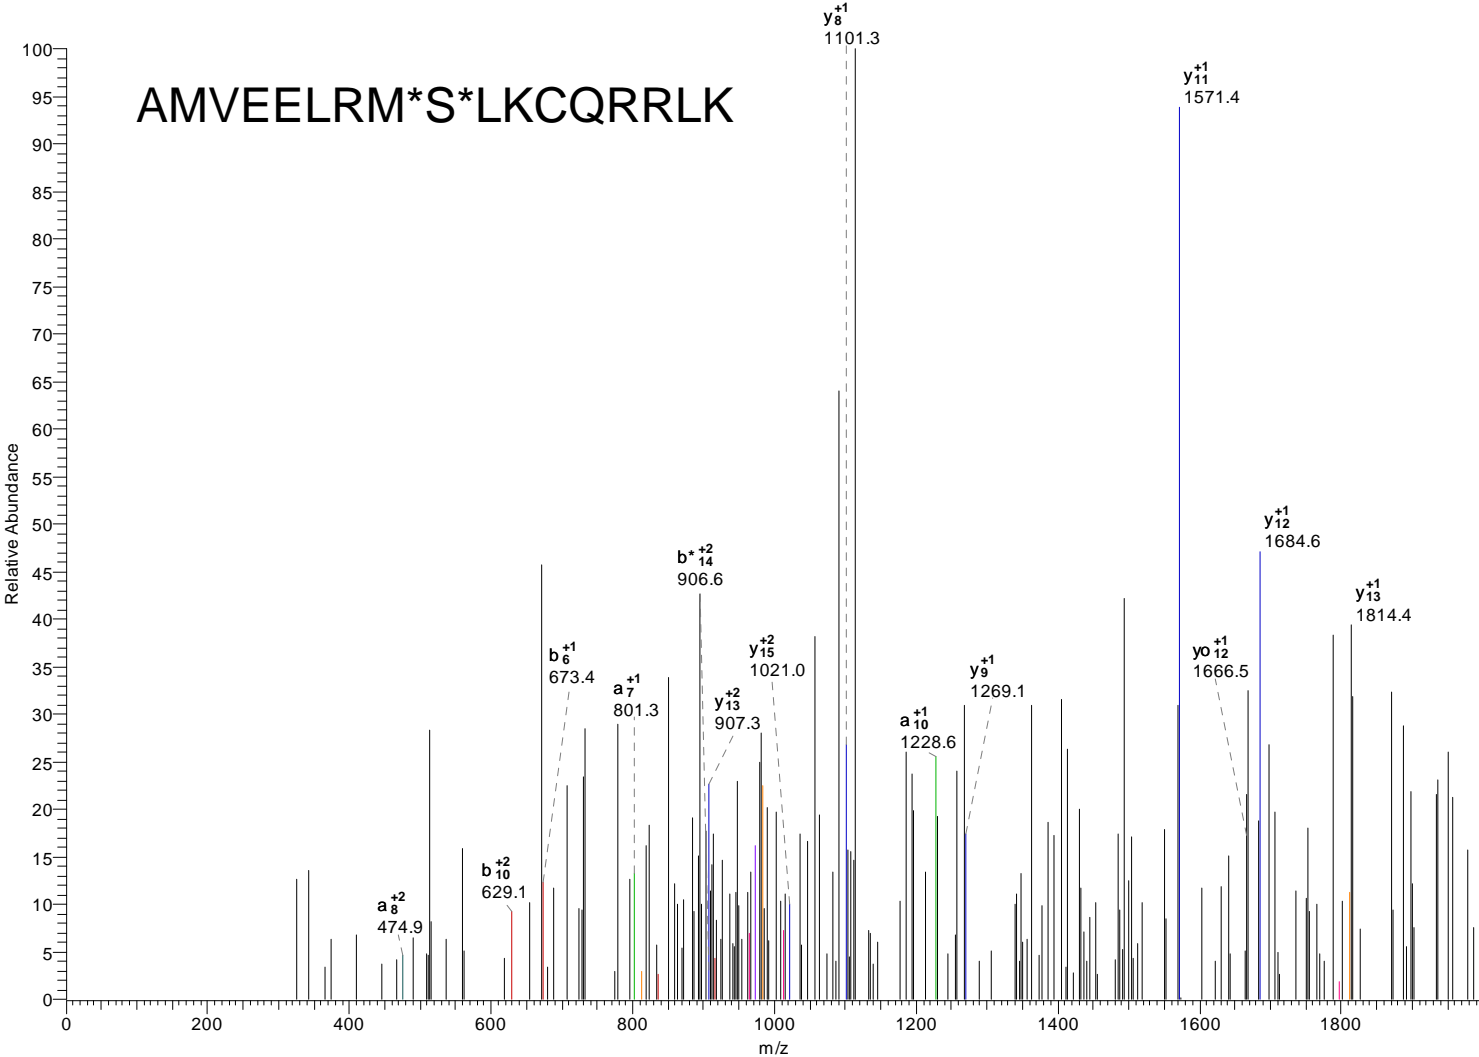

Supplement: supp_M109.081141_jbc.M109.081141-1.pdf [file supp_M109.081141_jbc.M109.081141-1.pdf]
